# Supplementary material for: Tackling Antibiotic Resistance: Influence of Aliphatic Branches on Broad-Spectrum Antibacterial Polytriazoles against ESKAPE Group Pathogens
Source: MDPI journal article supplement (doi:10.3390/pharmaceutics14112518), 2022-11-19
Supplement: s1 [file s1]

Article

# Tackling Antibiotic Resistance: Influence of Aliphatic Branches on Broad-Spectrum Antibacterial Polytriazoles against ESKAPE Group Pathogens

Cristian Rangel-Núñez <sup>1</sup>, Inmaculada Molina-Pinilla <sup>1</sup>, Cristina Ramírez-Trujillo <sup>1</sup>, Adrián Suárez-Cruz <sup>1</sup>, Samuel Bernal Martínez <sup>2</sup> and Manuel Bueno-Martínez <sup>1,\*</sup>

<sup>1</sup> Departamento de Química Orgánica y Farmacéutica, Facultad de Farmacia, Universidad de Sevilla, C/Profesor García González 2, 41012 Sevilla, Spain

<sup>2</sup> Servicio de Microbiología, Hospital Universitario Virgen de Valme, 41014 Sevilla, Spain;

\* Correspondence: mbueno@us.es

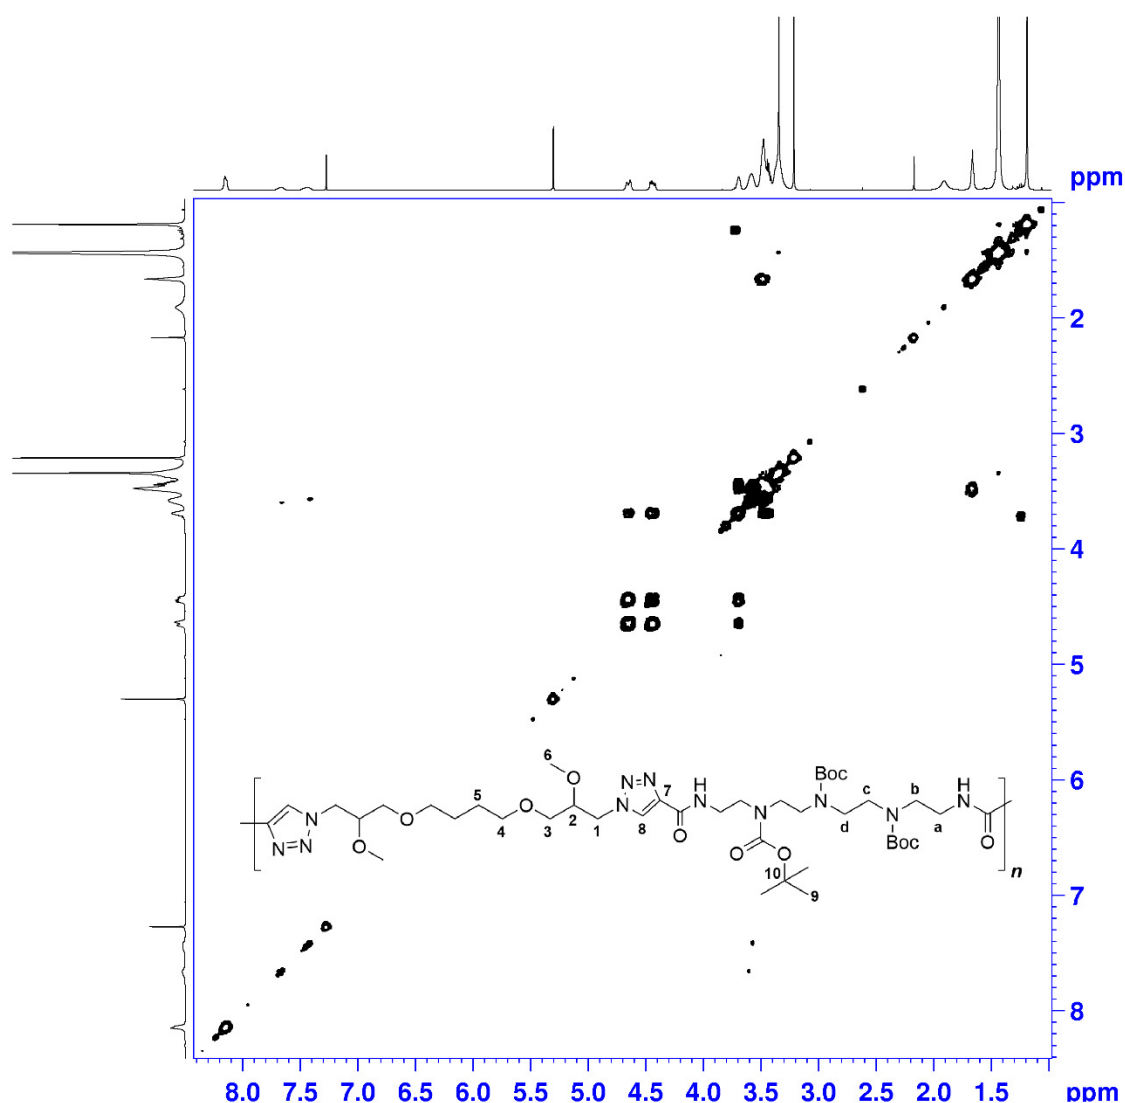

**Figure S1.** Two-dimensional homonuclear correlation spectrum (COSY) of polymer P2C recorded in deuteriochloroform.

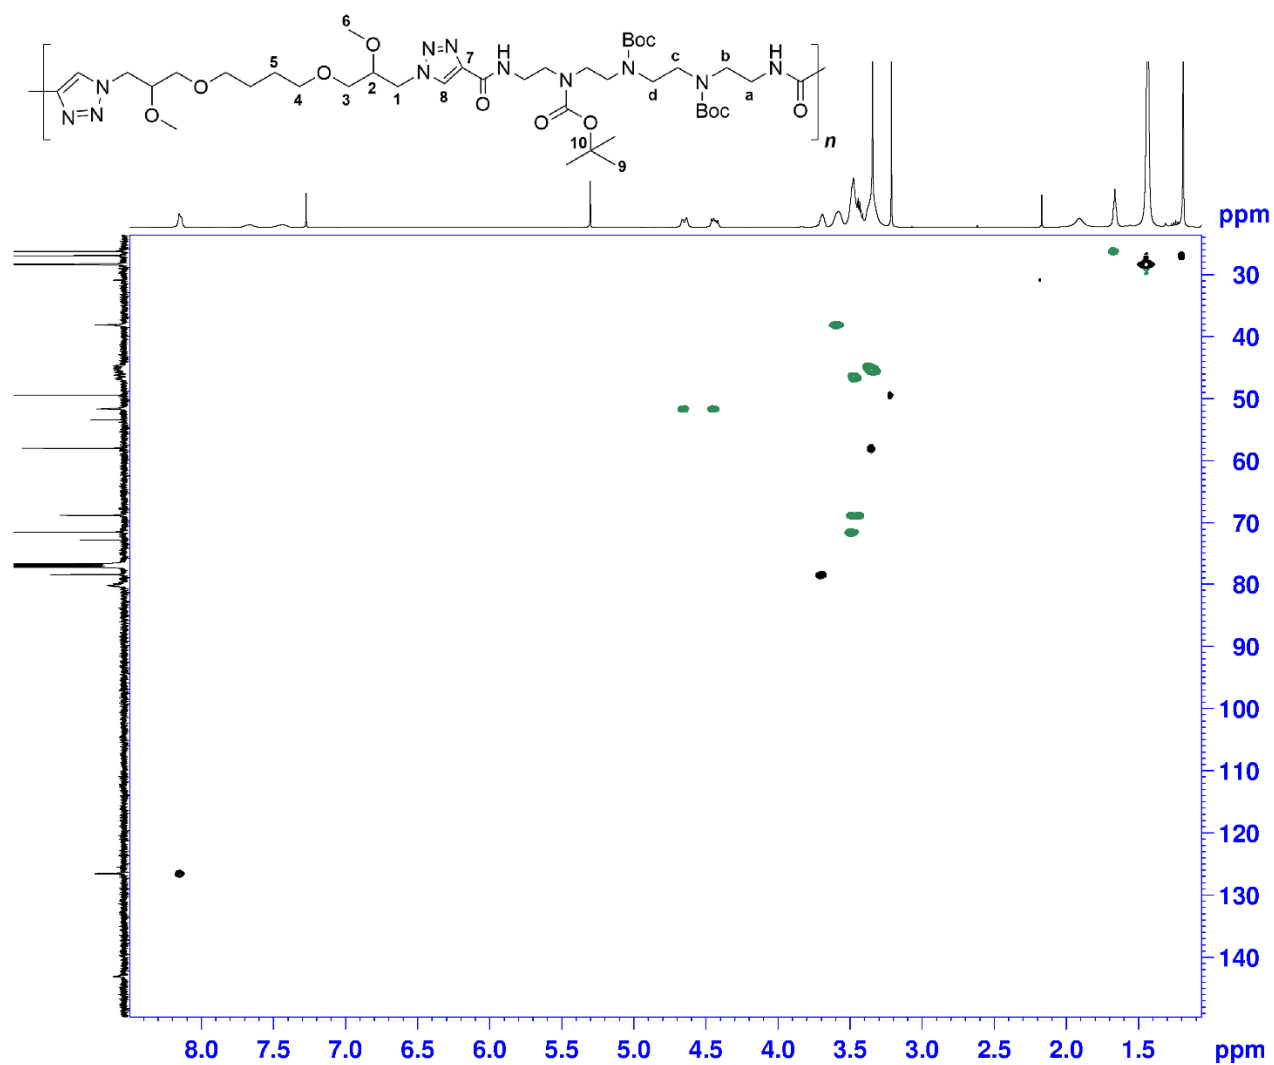

**Figure S2.** Two-dimensional heteronuclear correlation spectrum (HSQC) of polymer P2C recorded in deuteriochloroform.

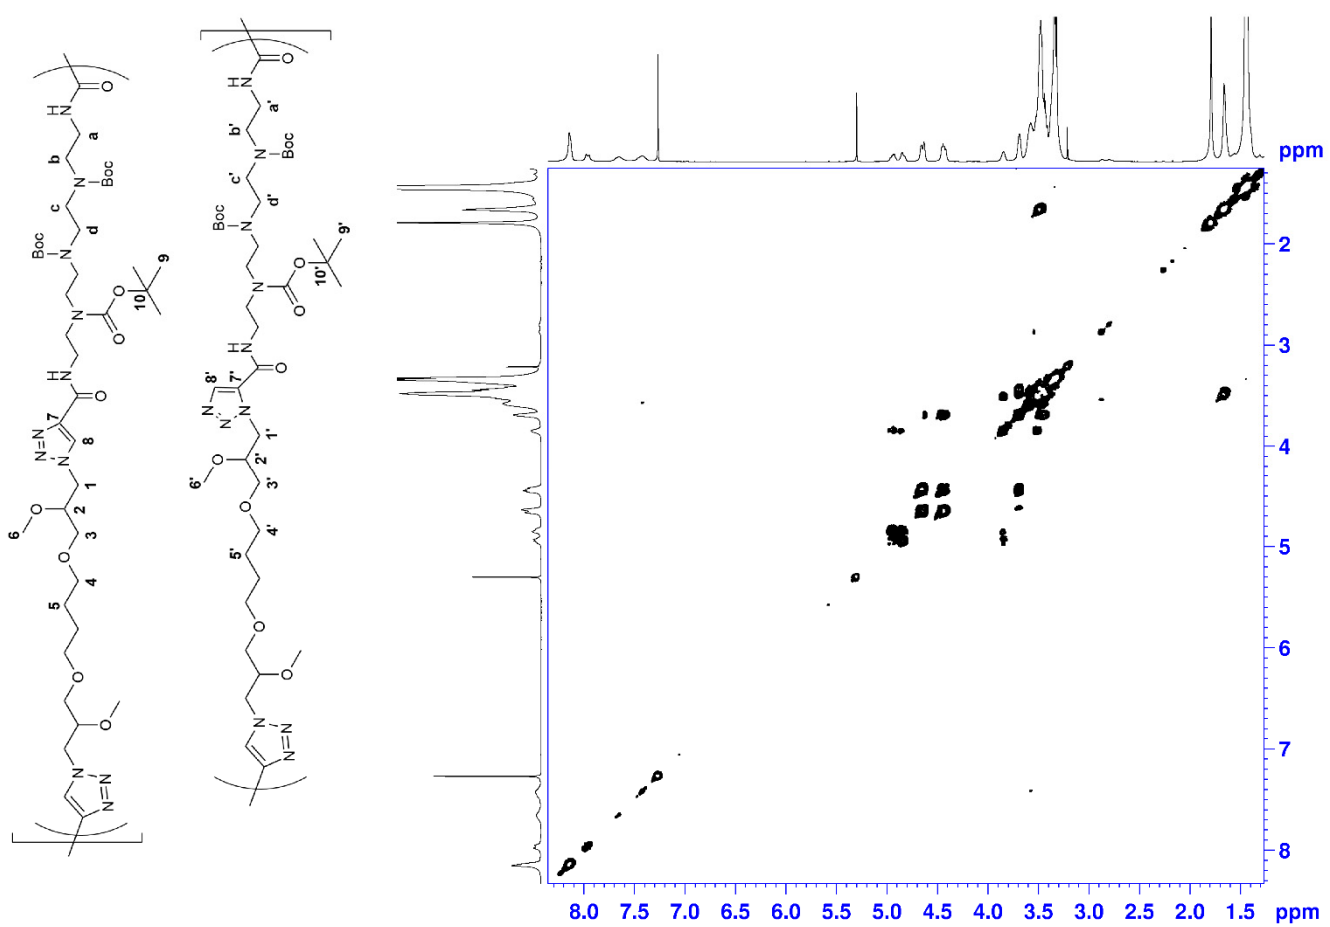

**Figure S3.** Two-dimensional homonuclear correlation spectrum (COSY) of polymer **P2T** recorded in deuteriochloroform.

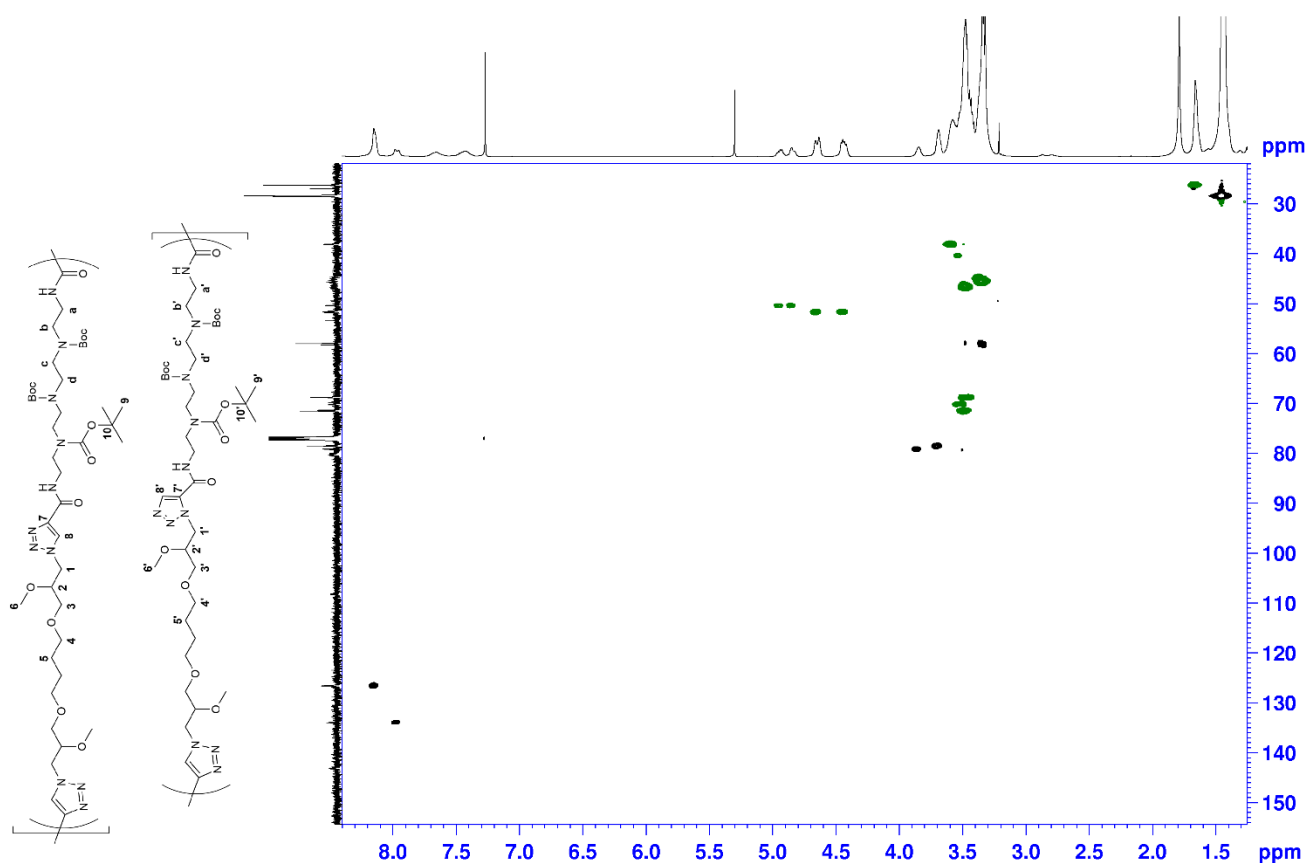

**Figure S4.** Two-dimensional heteronuclear correlation spectrum (HSQC) of polymer **P2T** recorded in deuteriochloroform.
